# Supplementary material for: Seroprevalence of SARS-CoV-2 antibodies prior to the widespread introduction of vaccine programmes in the WHO European Region, January - December 2020: a systematic review
Source: bioRxiv or medRxiv preprint supplement (doi:10.1101/2021.12.02.21266897), 2021-12-05
Supplement: Supplementary file [file media-1.pdf]

# Supplementary Material

## S1 Supplementary Methods

### S1.1 Search strategy and selection criteria

We searched the WHO “COVID-19 Global literature on coronavirus disease” database (MEDLINE, ELSEVIER and the pre-print servers medRxiv and bioRxiv) (100) using search terms that included a range of criteria relating to seroprevalence surveys. The search terms and inclusion and exclusion criteria are described below (Table S1).

### S1.2 Search terms

ti:sero\$urv\* or ti:serosurv\* or ti:seroepidemiolog\* or ti:sero\$epidemiolog\* or ti:serolog\* or ti:seropositiv\* or ti:seropositiv\* or ti:serosurveillance or ti:sero\$surveillance or ti:seroprevalence or ti:sero\$prevalence or ti:antibody or ti:antibodies or ti:immunity or ti:immunoglobulin OR ab:sero\$urv\* or ab:serosurv\* or ab:seroepidemiolog\* or ab:sero\$epidemiolog\* or ab:serolog\* or ab:seropositiv\* or ab:sero\$positiv\* or ab:serosurveillance or ab:sero\$surveillance or ab:seroprevalence or ab:sero\$prevalence

**Table S1 Inclusion and exclusion criteria**

| <b>Characteristics</b>       | <b>Inclusion criteria</b>                                                   | <b>Exclusion criteria</b>                                                                                                                                                                                                                                                                                   |
|------------------------------|-----------------------------------------------------------------------------|-------------------------------------------------------------------------------------------------------------------------------------------------------------------------------------------------------------------------------------------------------------------------------------------------------------|
| <b>Type of evidence</b>      | Published or unpublished scientific literature                              | Media reports (e.g. news items and press releases), reviews, assessed performance of a test, protocols                                                                                                                                                                                                      |
|                              | Completed or ongoing serosurveys                                            | Unrelated to seroprevalence                                                                                                                                                                                                                                                                                 |
|                              | Report seroprevalence estimates from one or multiple time points            |                                                                                                                                                                                                                                                                                                             |
|                              | Cross-sectional and cohort study designs                                    | Case-control studies, case reports or reviews                                                                                                                                                                                                                                                               |
| <b>Population</b>            | Studies of human participants, any age                                      | Studies of non-human participants (i.e. animal studies)                                                                                                                                                                                                                                                     |
|                              | Population groups considered to be representative of the general population | Population groups considered to be unrepresentative of the general population as they had higher risk of infection (e.g. healthcare workers and other high-risk groups).<br>Studies only of individuals with suspected (e.g. respiratory symptoms) or confirmed SARS-CoV-2 (RT-PCR laboratory confirmation) |
| <b>Geographical location</b> | WHO European region                                                         | Outside of WHO European Region                                                                                                                                                                                                                                                                              |
| <b>Languages</b>             | Any language                                                                | N/A                                                                                                                                                                                                                                                                                                         |

**Table S2: Description of the quality assessment criteria used**

| <b>Risk of bias criteria</b>                                                                                  | <b>Risk of bias assessment</b>                                                                                     | <b>Risk of bias scoring</b> |
|---------------------------------------------------------------------------------------------------------------|--------------------------------------------------------------------------------------------------------------------|-----------------------------|
| <b>Sampling frame: Representative of general population?</b>                                                  | Poor (e.g hospital admissions, GP visits, pregnant women, employees)                                               | 0                           |
|                                                                                                               | Weak (eg. blood donors)                                                                                            | 1                           |
|                                                                                                               | Good (e.g household sampling)                                                                                      | 2                           |
| <b>Sampling frame: Age profile included?</b>                                                                  | Does not cover those in target population (e.g study of 'all ages' excludes elderly or children)                   | 0                           |
|                                                                                                               | Study includes all those in target population                                                                      | 1                           |
|                                                                                                               | Includes all ages (including children)                                                                             | 2                           |
| <b>Sampling method: Were study participants sampled appropriate?</b>                                          | Non-random/non-exhaustive (including convenience sampling)                                                         | 0                           |
|                                                                                                               | Exhaustive                                                                                                         | 1                           |
|                                                                                                               | Random                                                                                                             | 2                           |
| <b>Sample size: Is sample size calculation described in methods?</b>                                          | Unclear                                                                                                            | 0                           |
|                                                                                                               | Yes                                                                                                                | 1                           |
| <b>Sample size: Was the sample size adequate?</b>                                                             | If at least 300 samples in the study then adequate OR if at least 100 samples per age group (if stratified by age) | 1                           |
|                                                                                                               | If NONE of above OR no mention in methods/unclear                                                                  | 0                           |
| <b>Test method: Use of more than one assays/test?</b>                                                         | Yes                                                                                                                | 1                           |
|                                                                                                               | No                                                                                                                 | 0                           |
| <b>Test method 1: Are tests sufficiently accurate? (no clinical validation)</b>                               | Sensitivity/specificity acceptable* (i.e ELISA: Sn $\geq$ 95%, Sp $>$ 97% OR POCT: Sn $\geq$ 90%, Sp $>$ 97%)      | 1                           |
|                                                                                                               | Sensitivity/specificity not acceptable (i.e ELISA: Sn $<$ 95%, Sp $<$ 97% OR POCT: Sn $<$ 90%, Sp $<$ 97%)         | 0                           |
| <b>Test method 2: Use of commercial tests with clinical validation?</b>                                       | Sensitivity/specificity acceptable* (i.e ELISA: Sn $\geq$ 95%, Sp $>$ 97% OR POCT: Sn $\geq$ 90%, Sp $>$ 97%)      | 2                           |
|                                                                                                               | Sensitivity/specificity not acceptable (i.e ELISA: Sn $<$ 95%, Sp $<$ 97% OR POCT: Sn $<$ 90%, Sp $<$ 97%)         | 1                           |
| <b>Test method 3: Use of in-house assay</b>                                                                   | Sensitivity/specificity acceptable* (i.e ELISA: Sn $\geq$ 95%, Sp $>$ 97% OR POCT: Sn $\geq$ 90%, Sp $>$ 97%)      | 2                           |
|                                                                                                               | Sensitivity/specificity not acceptable (i.e ELISA: Sn $<$ 95%, Sp $<$ 97% OR POCT: Sn $<$ 90%, Sp $<$ 97%)         | 1                           |
|                                                                                                               | No results reported                                                                                                | 0                           |
| <b>Data analysis: Were the results adjusted according to sensitivity/specificity of the serological test?</b> | Yes and Confidence intervals presented                                                                             | 2                           |
|                                                                                                               | Yes but no Confidence intervals presented                                                                          | 1                           |
|                                                                                                               | No/Unclear                                                                                                         | 0                           |
| <b>Overall risk of bias</b>                                                                                   | <b>High risk of bias</b>                                                                                           | <b>1-3</b>                  |
|                                                                                                               | <b>Moderate risk of bias</b>                                                                                       | <b>4-6</b>                  |
|                                                                                                               | <b>Low-risk bias</b>                                                                                               | <b><math>&gt;</math>6</b>   |

## **S2 Supplementary Results**

**Figure S1 Forest plot of the seroprevalence of SARS-CoV-2 antibodies in Community/Household samples with corresponding 95% confidence intervals in WHO European Region (1/1/2020-31/12/2020)**

See PDF file attached separately

**Figure S2: Forest plot of the seroprevalence of SARS-CoV-2 antibodies in (Top to bottom, Left to Right) a) Residual sera b) Blood donors c) Pregnant or Parturient women d) Patients seeking care (non-COVID) and e) Other populations**

See PDF file attached separately

**Figure S3 Time point of conducted sero-epidemiology studies in relation to country epidemic activity**

See PDF file attached separately
