# Supplementary material for: Seroprevalence of SARS-CoV-2 antibodies prior to the widespread introduction of vaccine programmes in the WHO European Region, January - December 2020: a systematic review
Source: bioRxiv or medRxiv preprint supplement (doi:10.1101/2021.12.02.21266897), 2021-12-05

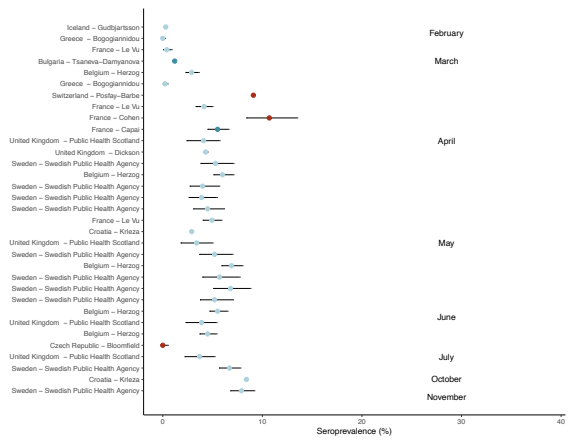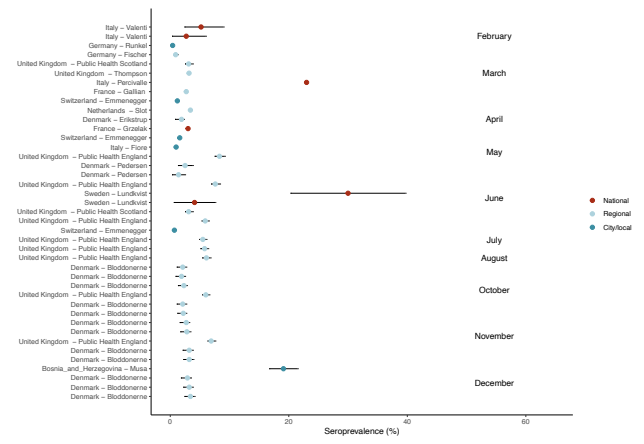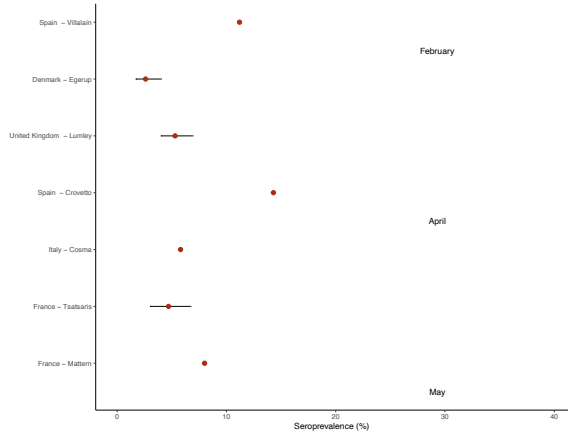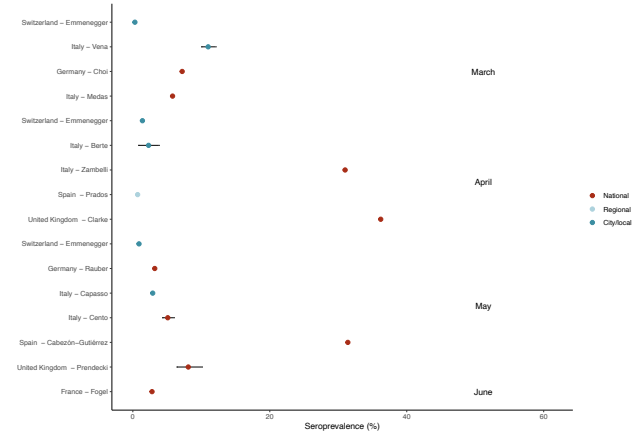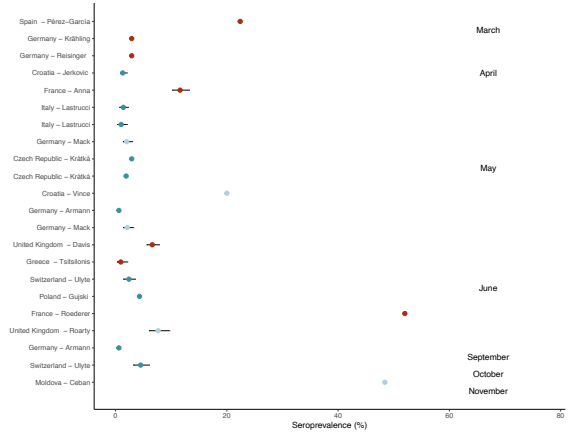

Supplement: Supplementary file [file media-3.pdf]
